# Supplementary material for: Ex Vivo Fermentation of Hay and Corn by Rumen Bacteria from Cattle and Sheep
Source: MDPI journal article supplement (doi:10.3390/fermentation9110929), 2023-10-25
Supplement: s1 [file s1]

**Table S1.** Liquid media composition.

| Medium                                                  | Composition (per Liter basis)                                                                                                                                                                                                                                                                                                                                                                                                                                                                                                                                                                                                                                                                                                                                                                                                                                                                                                                                                                                                                                                                                                                                                                                                                                                                                                                                                                                                                        |
|---------------------------------------------------------|------------------------------------------------------------------------------------------------------------------------------------------------------------------------------------------------------------------------------------------------------------------------------------------------------------------------------------------------------------------------------------------------------------------------------------------------------------------------------------------------------------------------------------------------------------------------------------------------------------------------------------------------------------------------------------------------------------------------------------------------------------------------------------------------------------------------------------------------------------------------------------------------------------------------------------------------------------------------------------------------------------------------------------------------------------------------------------------------------------------------------------------------------------------------------------------------------------------------------------------------------------------------------------------------------------------------------------------------------------------------------------------------------------------------------------------------------|
| <b>Cell Suspension/<br/>Cellulolytic<sup>1</sup></b>    | <ul style="list-style-type: none"> <li>• 240 mg KH<sub>2</sub>PO<sub>4</sub></li> <li>• 240 mg K<sub>2</sub>HPO<sub>4</sub></li> <li>• 480 mg (NH<sub>4</sub>)<sub>2</sub>SO<sub>4</sub></li> <li>• 480 mg NaCl</li> <li>• 64 mg CaCl<sub>2</sub> • 2H<sub>2</sub>O</li> <li>• 100 mg MgSO<sub>4</sub> • 7H<sub>2</sub>O</li> <li>• 600 mg cysteine hydrochloride</li> <li>• 1,000 mg Trypticase</li> <li>• 500 mg yeast extract</li> <li>• 1 mg phenylacetic acid</li> <li>• 3.1 mL VFA solution (7.15 mol L-1 acetic acid, 1.92 mol L-1, propionic acid, 783.66 mmol l-1 butyric acid, 222.28 mmol l-1 valeric acid, 216.19 mmol l-1 isovaleric acid, 264.13 mmol l-1 isobutyric acid, 227.87 mmol l-1 2-methylbutyric acid).</li> </ul>                                                                                                                                                                                                                                                                                                                                                                                                                                                                                                                                                                                                                                                                                                           |
| <b>Hyper-Ammonia<br/>Producing Bacteria<sup>2</sup></b> | <ul style="list-style-type: none"> <li>• 240 mg KH<sub>2</sub>PO<sub>4</sub></li> <li>• 240 mg K<sub>2</sub>HPO<sub>4</sub></li> <li>• 480 mg Na<sub>2</sub>SO<sub>4</sub></li> <li>• 480 mg NaCl</li> <li>• 64 mg CaCl<sub>2</sub> • 2H<sub>2</sub>O</li> <li>• 100 mg MgSO<sub>4</sub> • 7H<sub>2</sub>O</li> <li>• 600 mg cysteine hydrochloride</li> <li>• 10 mL vitamin solution (4.14.75 <math>\mu</math>mol L-1 pyridoxamine 2 HC., 531.41 <math>\mu</math>mol L-1 riboflavin, 592.99 <math>\mu</math>mol L-1, 592.99 <math>\mu</math>mol L-1 thiamine HCl, 1.64 mmol l-1 nicotinamide, 419.73 <math>\mu</math>mol L-1 CaD pantothenate, 484.66 <math>\mu</math>mol L-1 lipoic acid, 72.92 <math>\mu</math>mol L-1 p-aminobenzoic acid, 11.33 <math>\mu</math>mol-1 folic acid, 20.47 <math>\mu</math>mol L-1 biotin, 3.69 <math>\mu</math>mol L-1 cobalamine, 491.11 <math>\mu</math>mol L-1 pyridoxal HCl, 591.09 <math>\mu</math>mol L-1 pyridoxine)</li> <li>• 5 mL trace mineral solution (5.44 mmol l-1 Na<sub>4</sub> EDTA, 719 <math>\mu</math>mol L-1 FeSO<sub>4</sub>, 34.78 <math>\mu</math>mol ZnSO<sub>4</sub>, 1.01 mmol l-1 MnCl<sub>2</sub>, 323.47 <math>\mu</math>mol L-1, H<sub>3</sub>BO<sub>3</sub>, 96.61 <math>\mu</math>mol L-1 CoCl<sub>2</sub>. 5.87 <math>\mu</math>mol L-1 CuCl<sub>2</sub>, 8.41 <math>\mu</math>mol L-1 NiCl<sub>2</sub> 6.98 <math>\mu</math>mol L-1 Na<sub>2</sub>MoO<sub>4</sub>)</li> </ul> |
| <b>Lactate-Utilizing<br/>Bacteria<sup>3</sup></b>       | <ul style="list-style-type: none"> <li>• 352 mg KH<sub>2</sub>PO<sub>4</sub></li> <li>• 352 mg K<sub>2</sub>HPO<sub>4</sub></li> <li>• 704 mg Na<sub>2</sub>SO<sub>4</sub></li> <li>• 701 mg NaCl</li> <li>• 94 mg CaCl<sub>2</sub> • 2H<sub>2</sub>O</li> <li>• 147 mg MgSO<sub>4</sub> • 7H<sub>2</sub>O</li> <li>• 100 mg cysteine</li> <li>• 220 mmol lactic acid</li> <li>• 7.67 <math>\mu</math>mol hemin</li> <li>• 10 mL vitamin solution (as described above)</li> <li>• 10 mL mineral (as described above)</li> <li>• 10 mL VFA (as described above)</li> </ul>                                                                                                                                                                                                                                                                                                                                                                                                                                                                                                                                                                                                                                                                                                                                                                                                                                                                            |

<sup>1</sup>Prepared based on protocol described by Stack et al. [16]. <sup>2</sup>Prepared as previously described by Russell et al. [18] and Chen and Russell [19]. <sup>3</sup>Prepared as described by Mackie and Heath [20].
